# Supplementary material for: Thermodynamic Overview of Bioconjugation Reactions Pertinent to Lysine and Cysteine Peptide and Protein Residues
Source: MDPI journal article supplement (doi:10.3390/compounds3030035), 2023-08-30
Supplement: s1 [file s1]

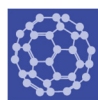

## Supplementary Materials

# Thermodynamic Overview of Bioconjugation Reactions Pertinent to Lysine and Cysteine Peptide and Protein Residues

Maja Lopandic, Fatima Merza and John F. Honek \*

### Tables

Table S1: T1 and G3(MP2) energies for reaction of water and methylamine with example phenyl esters

Table S2: T1 and G3(MP2) energies for reaction of water and methylamine with example phenyl esters -continued

Table S3: T1 and G3(MP2) energies for reaction of water and methylamine with example N-hydroxysuccinimide esters

Table S4: T1 and G3(MP2) energies for reaction of water and methylamine with example carbonates

Table S5: T1 and G3(MP2) energies for reaction of water and methylamine with example isocyanates and isothiocyanates

Table S6: T1 and G3(MP2) energies for reaction of methylamine with imidates, sulfonyl chlorides, epoxides, maleimides, and 2, 4-dinitrofluorobenzene

Table S7: T1 and G3(MP2) energies for reaction of methylamine with example squarate esters and aldehydes

Table S8: T1 and G3(MP2) energies for reaction of methanethiol with sulfonyl chlorides, epoxides, maleimides, and 2, 4-dinitrofluorobenzene

Table S9: T1 and G3(MP2) energies for reaction of methanethiol with examples of disulfides,  $\alpha$ -bromoacids and  $\alpha$ -bromoamides, dibromomaleimides, and reaction of acetaldehyde with N-acetylhydrazide

Table S10: T1 energies for examples of common click reactions

**Table S1.** T1 and G3(MP2) energies for reaction of water and methylamine with example phenyl esters

| Reaction                                                                                                                                                                   | T1 $\Delta E$<br>(kJ/mol) | G3(MP2) $\Delta E$<br>(kJ/mol) |
|----------------------------------------------------------------------------------------------------------------------------------------------------------------------------|---------------------------|--------------------------------|
| 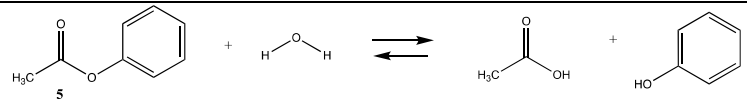<br><chem>CC(=O)Oc1ccccc1.O&gt;&gt;CC(=O)O.Oc1ccccc1</chem>                               | -3.89                     | -2.35                          |
| <br><chem>CC(=O)Oc1ccccc1.CN&gt;&gt;CC(=O)NC.Oc1ccccc1</chem>                             | -25.58                    | -27.87                         |
| <br><chem>CC(=O)Oc1ccc([N+](=O)[O-])cc1.O&gt;&gt;CC(=O)O.Oc1ccc([N+](=O)[O-])cc1</chem>   | -7.89                     | -6.05                          |
| <br><chem>CC(=O)Oc1ccc([N+](=O)[O-])cc1.CN&gt;&gt;CC(=O)NC.Oc1ccc([N+](=O)[O-])cc1</chem> | -29.68                    | -31.57                         |
| <br><chem>CC(=O)Oc1ccc(F)cc1.O&gt;&gt;CC(=O)O.Oc1ccc(F)cc1</chem>                        | -2.45                     | -0.18                          |
| <br><chem>CC(=O)Oc1ccc(F)cc1.CN&gt;&gt;CC(=O)NC.Oc1ccc(F)cc1</chem>                     | -24.14                    | -25.7                          |
| <br><chem>CC(=O)Oc1cc(F)c(F)cc1.O&gt;&gt;CC(=O)O.Oc1cc(F)c(F)cc1</chem>                 | -7.15                     | -4.67                          |
| <br><chem>CC(=O)Oc1cc(F)c(F)cc1.CN&gt;&gt;CC(=O)NC.Oc1cc(F)c(F)cc1</chem>               | -28.84                    | -30.19                         |
| <br><chem>CC(=O)Oc1cc(F)c(F)cc1.O&gt;&gt;CC(=O)O.Oc1cc(F)c(F)cc1</chem>                 | -6.83                     | -5.35                          |
| <br><chem>CC(=O)Oc1cc(F)c(F)cc1.CN&gt;&gt;CC(=O)NC.Oc1cc(F)c(F)cc1</chem>               | -28.52                    | -30.87                         |

**Table S2.** T1 and G3(MP2) energies for reaction of water and methylamine with example phenyl esters

| Reaction                                                                            | T1 $\Delta E$<br>(kJ/mol) | G3(MP2) $\Delta E$<br>(kJ/mol) |
|-------------------------------------------------------------------------------------|---------------------------|--------------------------------|
| 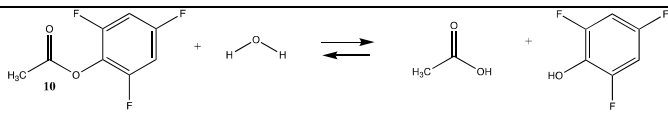   | -5.03                     | -1.84                          |
|    | -26.72                    | -27.36                         |
|    | -4.87                     | -3.13                          |
|   | -26.56                    | -28.65                         |
|  | -8.01                     | -5.64                          |
|  | -29.7                     | -31.16                         |
|  | -5.81                     | -3.25                          |
|  | -27.50                    | -28.77                         |

**Table S3.** T1 and G3(MP2) energies for reaction of water and methylamine with example N-hydroxysuccinimide esters

| Reaction | T1 $\Delta E$<br>(kJ/mol) | G3(MP2) $\Delta E$<br>(kJ/mol) |
|----------|---------------------------|--------------------------------|
|          | 5.38                      | 9.67                           |
|          | -16.35                    | -15.85                         |
|          | 8.47                      | 15.91                          |
|          | -13.22                    | -9.61                          |

**Table S4.** T1 and G3(MP2) energies for reaction of water and methylamine with example carbonates

| Reaction                                                                                                                                                                          | T1 $\Delta E$<br>(kJ/mol) | G3(MP2) $\Delta E$<br>(kJ/mol) |
|-----------------------------------------------------------------------------------------------------------------------------------------------------------------------------------|---------------------------|--------------------------------|
| 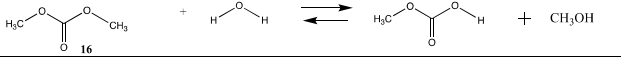 <chem>CCOC(=O)OC + O &gt;&gt; CCOC=O + CO</chem>                                                | 19.32                     | 22.14                          |
|  <chem>CCOC(=O)OC + CN &gt;&gt; CCOC(=O)N + CO</chem>                                            | -17.02                    | -16.23                         |
|  <chem>COC(=O)N1CCCC1=O + O &gt;&gt; CCOC=O + N1CCCC1=O</chem>                                   | -3.18                     | 0.96                           |
|  <chem>COC(=O)N1CCCC1=O + CN &gt;&gt; CCOC(=O)N + N1CCCC1=O</chem>                               | -39.56                    | -37.41                         |
|  <chem>CCOC(=O)Oc1ccc([N+](=O)[O-])cc1 + O &gt;&gt; CCOC=O + Oc1ccc([N+](=O)[O-])cc1</chem>      | -9.64                     | -5.86                          |
|  <chem>CCOC(=O)Oc1ccc([N+](=O)[O-])cc1 + CN &gt;&gt; CCOC(=O)N + Oc1ccc([N+](=O)[O-])cc1</chem> | -46.01                    | -44.23                         |

**Table S5.** T1 and G3(MP2) energies for reaction of water and methylamine with example isocyanates and isothiocyanates

| Reaction                                                                                                                              | T1 $\Delta E$<br>(kJ/mol) | G3(MP2) $\Delta E$<br>(kJ/mol) |
|---------------------------------------------------------------------------------------------------------------------------------------|---------------------------|--------------------------------|
| 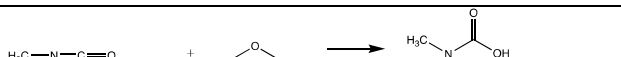 <chem>CN=C=O + O &gt;&gt; OC=O</chem>             | -64.26                    | -78.19                         |
|  <chem>CN=C=O + CN &gt;&gt; CN(C)C=O</chem>        | -75.77                    | -93.84                         |
|  <chem>c1ccccc1N=C=O + O &gt;&gt; OC=O</chem>      | -66.13                    | -79.54                         |
|  <chem>c1ccccc1N=C=O + CN &gt;&gt; CN(C)C=O</chem> | -77.45                    | -96.78                         |
|  <chem>CN=C=S + O &gt;&gt; OS=C</chem>             | -38.12                    | -57.55                         |
|  <chem>CN=C=S + CN &gt;&gt; CN(C)C=S</chem>        | -64.82                    | -81.91                         |
|  <chem>c1ccccc1N=C=S + O &gt;&gt; OS=C</chem>      | -27.32                    | -42.55                         |
|  <chem>c1ccccc1N=C=S + CN &gt;&gt; CN(C)C=S</chem> | -63.36                    | -83.51                         |

**Table S7.** T1 and G3(MP2) energies for reaction of methylamine with example squarate esters and aldehydes

| Reaction                                                                          | T1 $\Delta E$<br>(kJ/mol) | G3(MP2) $\Delta E$<br>(kJ/mol) |
|-----------------------------------------------------------------------------------|---------------------------|--------------------------------|
| 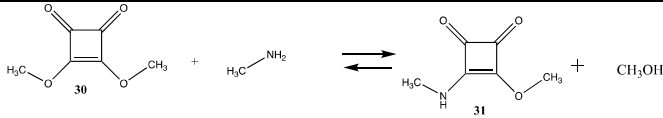 | -43.40                    | -42.02                         |
|  | -22.09                    | -21.21                         |
|  | -20.75                    | -20.79                         |
|  | -14.26                    | -17.60                         |

**Table S6.** T1 and G3(MP2) energies for reaction of methylamine with imidates, sulfonyl chlorides, epoxides, maleimides, and 2, 4-dinitrofluorobenzene

| Reaction                                                                            | T1 $\Delta E$<br>(kJ/mol) | G3(MP2) $\Delta E$<br>(kJ/mol) |
|-------------------------------------------------------------------------------------|---------------------------|--------------------------------|
| 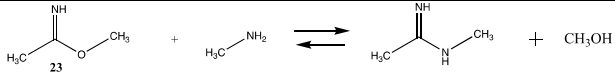 | 2.46                      | 1.7                            |
|  | -7.82                     | -7.79                          |
|  | -41.27                    | -45.13                         |
|  | -41.71                    | -46.47                         |
|  | -130.77                   | -131.53                        |
|  | -83.71                    | -86.89                         |
|  | -95.89                    | -98.88                         |

**Table S8.** T1 and G3(MP2) energies for reaction of methanethiol with sulfonyl chlorides, epoxides, maleimides, and 2, 4-dinitrofluorobenzene

| Reaction                                                                          | T1 $\Delta E$<br>(kJ/mol) | G3(MP2)<br>$\Delta E$ (kJ/mol) |
|-----------------------------------------------------------------------------------|---------------------------|--------------------------------|
| 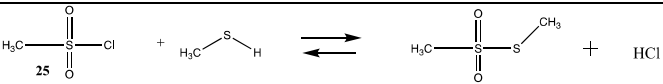 | -24.31                    | -23.90                         |
|  | -27.63                    | -34.21                         |
|  | -139.38                   | -146.23                        |
|  | -98.05                    | -97.40                         |
|  | -63.13                    | -57.03                         |

**Table S9.** T1 and G3(MP2) energies for reaction of methanethiol with examples of disulfides,  $\alpha$ -bromoacids and  $\alpha$ -bromoamides, dibromomaleimides, and reaction of acetaldehyde with N-acetylhydrazide

| Reaction                                                                            | T1 $\Delta E$<br>(kJ/mol) | G3(MP2) $\Delta E$<br>(kJ/mol) |
|-------------------------------------------------------------------------------------|---------------------------|--------------------------------|
| 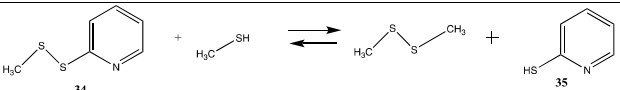 | -0.82                     | -2.37                          |
|  | 4.33                      | 4.83                           |
|  | -26.32                    | -29.38                         |
|  | -21.82                    | -24.96                         |
|  | -44.54                    | -42.34                         |
|  | -38.58                    | -35.37                         |
|  | -29.17                    | -33.82                         |

Table S10. T1 energies for examples of common click reactions

| Reaction                                                          | T1 $\Delta E$<br>(kJ/mol) |
|-------------------------------------------------------------------|---------------------------|
| <p>44 + 45 <math>\rightleftharpoons</math> 46</p>                 | -252.43                   |
| <p>44 + 47 <math>\rightleftharpoons</math> 48</p>                 | -290.38                   |
| <p>44 + 49 <math>\rightleftharpoons</math> 50</p>                 | -290.18                   |
| <p>51 + 52 <math>\rightleftharpoons</math> 53 + N<sub>2</sub></p> | -282.85                   |
